# Supplementary material for: Inactivation of class II PI3K-C2α induces leptin resistance, age-dependent insulin resistance and obesity in male mice
Source: PubMed Central journal article supplement (PMC4901096; doi:10.1007/s00125-016-3963-y), 2016-04-30
Supplement: 125_2016_3963_MOESM4_ESM.pdf [file 125_2016_3963_MOESM4_ESM.pdf]

## Inactivation of class II PI3K-C2 $\alpha$ induces leptin resistance, age-dependent insulin resistance and obesity in male mice

**ESM Table 1** List of organs and tissues from C2 $\alpha$ <sup>D1268A/WT</sup> mice subjected to histological examination (H&E staining).

|                                          |                                            |
|------------------------------------------|--------------------------------------------|
| adrenal glands                           | pituitary                                  |
| aorta                                    | prostate                                   |
| bones (femur/stifle joint)               | salivary gland                             |
| brain                                    | seminal vesicles                           |
| brown fat pad (scapular and peri-aortic) | skeletal muscle (gastrocnemius)            |
| epididymides                             | skin and mammary glands                    |
| eyes                                     | small intestine (duodenum, ileum, jejunum) |
| gall bladder                             | spinal cord                                |
| heart                                    | spleen                                     |
| ileum, jejunum                           | sternum                                    |
| kidneys                                  | stomach                                    |
| large bowel (caecum, colon, rectum)      | submandibular lymph nodes                  |
| liver                                    | testes-ovaries/oviducts                    |
| lung                                     | thymus/thymic area                         |
| mesenteric lymph nodes                   | tongue                                     |
| oesophagus                               | trachea                                    |
| pancreas                                 | urinary bladder                            |
| parathyroids and thyroids                | uterus/vagina/cervix                       |
| peripheral nerve (sciatic)               | white fat pad (perigenital and perirenal)  |
