# Supplementary material for: Inactivation of class II PI3K-C2α induces leptin resistance, age-dependent insulin resistance and obesity in male mice
Source: Diabetologia. 2016 Apr 30;59:1503–12. doi: 10.1007/s00125-016-3963-y (PMC4901096; doi:10.1007/s00125-016-3963-y)
Supplement: Supplementary file 2 — (PDF 532 kb) [file 125_2016_3963_MOESM2_ESM.pdf]

ESM Fig.1

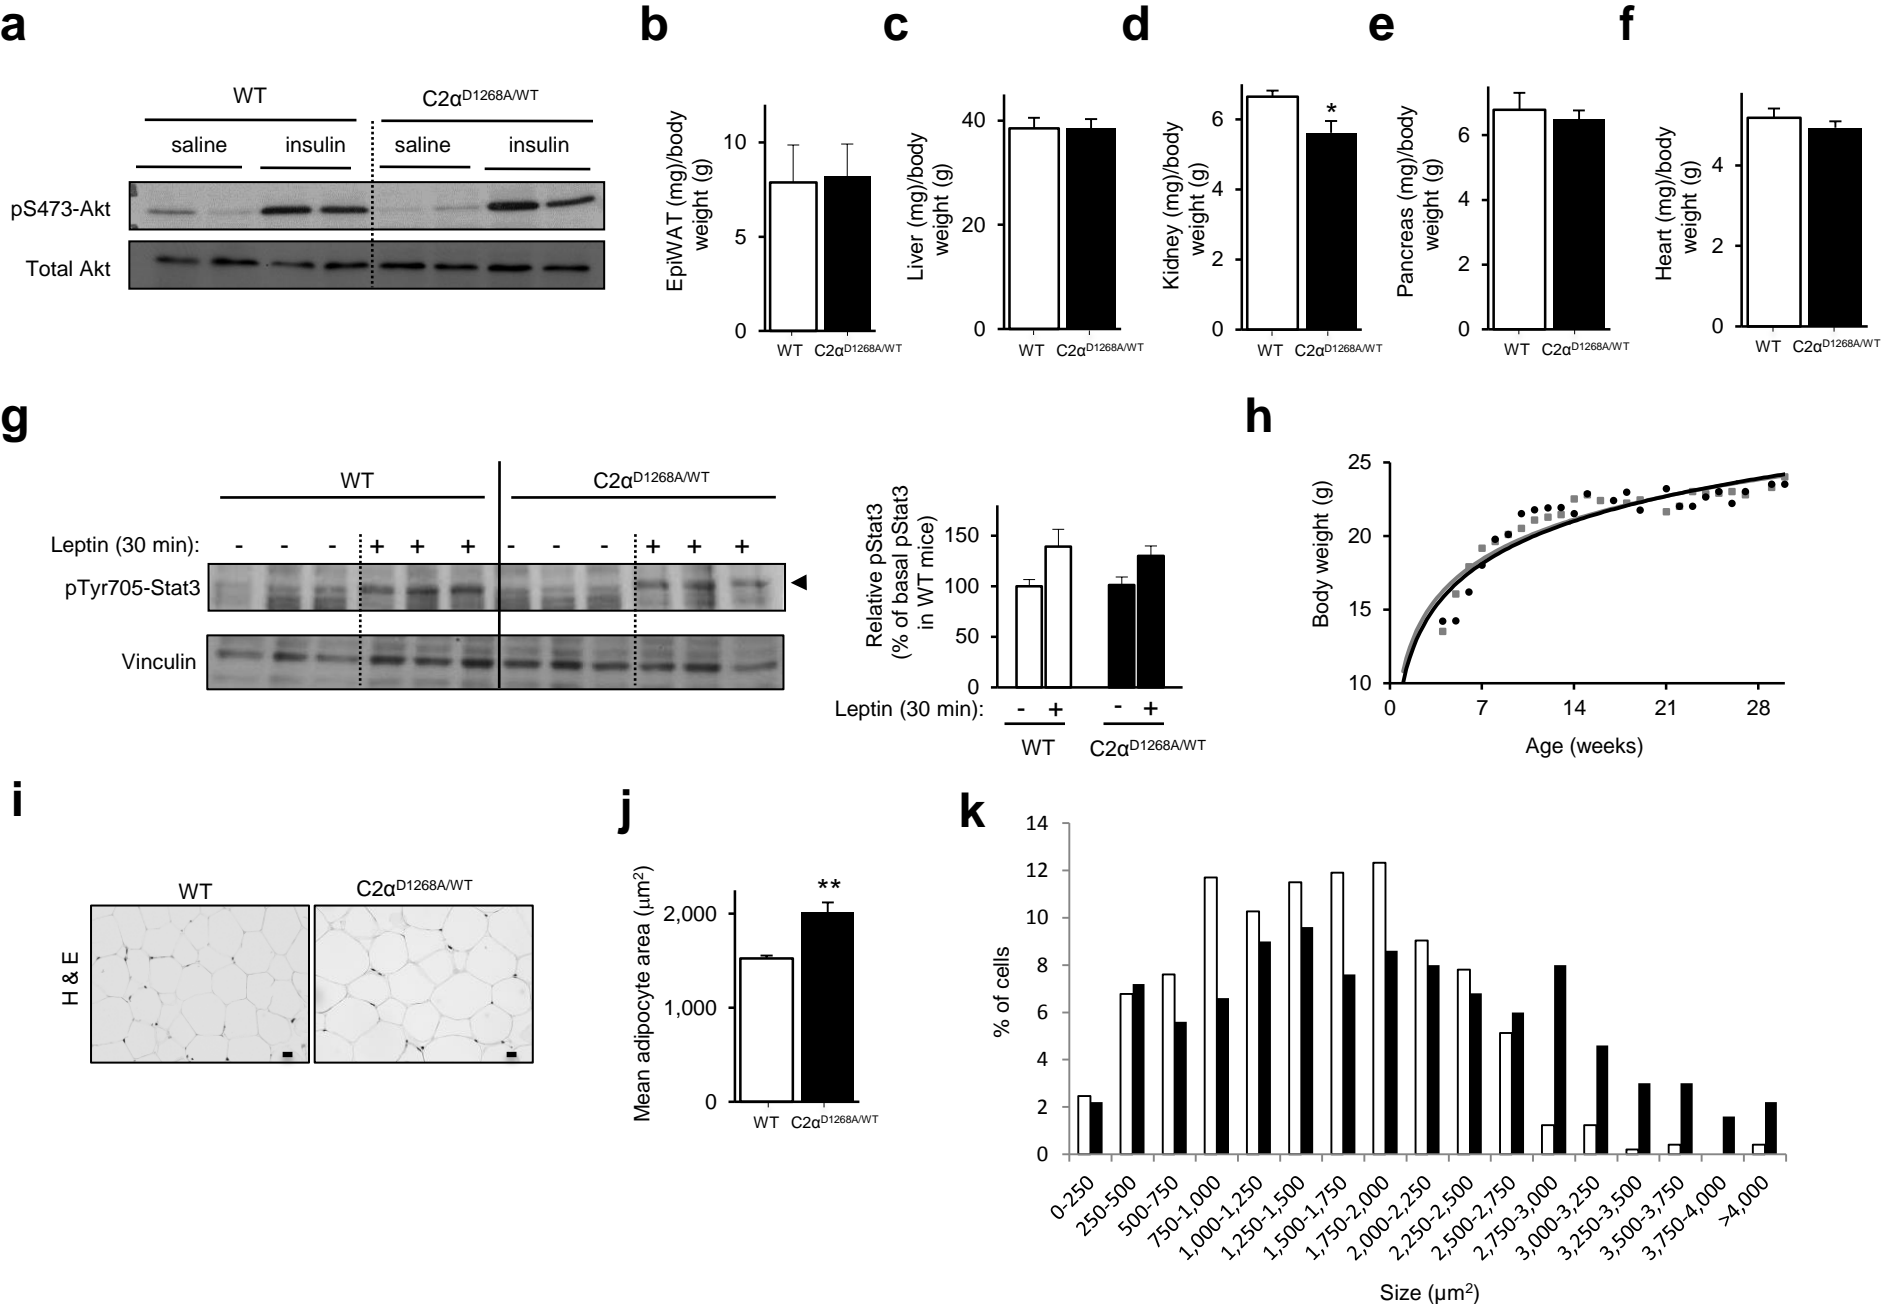

# Inactivation of class II PI3K-C2 $\alpha$ induces leptin resistance, age-dependent insulin resistance and obesity in male mice

## Electronic Supplementary Material

**ESM Fig.1** Metabolic characteristics and signalling in WT and C2 $\alpha^{D1268A/WT}$  mice. Data represent mean  $\pm$  SEM.

(a) Insulin signalling in the liver of 12-week-old male mice. Hepatic homogenates from mice injected i.p. with 0.75U insulin/kg (30 min) were analyzed by SDS-PAGE and immunoblotting using the indicated antibodies. Each lane on the SDS-PAGE gel represents an individual mouse.

(b-f) Organ weight to body weight ratios from 12-week-old male mice. Epididymal WAT (b), liver (c), kidney (d), pancreas (e) and heart (f). n=6-8 mice were used.

(g) Hypothalamic leptin signaling in 12-week-old female mice. Hypothalamic homogenates from mice injected i.p. with 2.5 mg leptin/kg (30 min) were analyzed by SDS-PAGE and immunoblotting using the indicated antibodies. Each lane on the SDS-PAGE gel represents an individual mouse.

(h) Whole-body weight variation upon ageing in female mice. n=6-8 mice were used. Grey square, WT; black circle, C2 $\alpha^{D1268A/WT}$ .

(i-k) Perirenal WAT histology from 32-week-old mice. H&E of epididymal WAT sections are shown (i). Mean adipocyte areas (j) and adipocyte area distribution profiles (k) are also shown. Data are representative of perirenal WAT sections from individual mice. n=6 mice were used. Scale bar: 20 $\mu$ m. White bars, WT; black bars, C2 $\alpha^{D1268A/WT}$ .

\* p< 0.05; \*\* p< 0.01.
