# Supplementary material for: Inactivation of class II PI3K-C2α induces leptin resistance, age-dependent insulin resistance and obesity in male mice
Source: Diabetologia. 2016 Apr 30;59:1503–12. doi: 10.1007/s00125-016-3963-y (PMC4901096; doi:10.1007/s00125-016-3963-y)
Supplement: Supplementary file 3 — (PDF 267 kb) [file 125_2016_3963_MOESM3_ESM.pdf]

ESM Fig.2

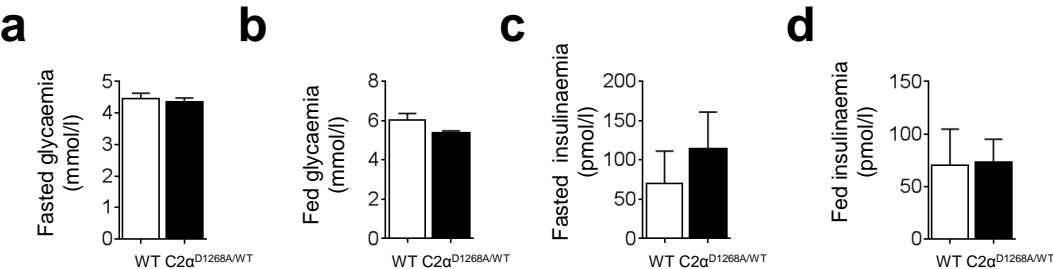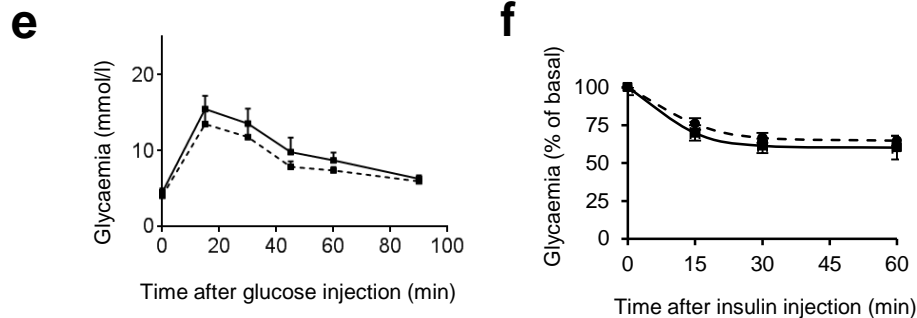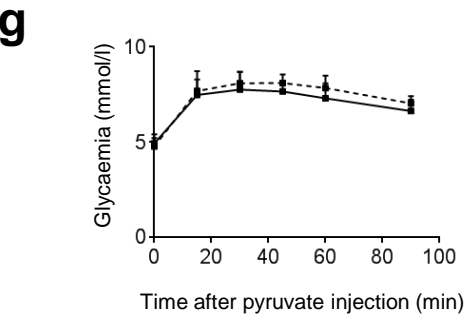

## **Inactivation of class II PI3K-C2 $\alpha$ induces leptin resistance, age-dependent insulin resistance and obesity in male mice**

### **Electronic Supplementary Material**

**ESM Fig.2** Metabolic characteristics in WT and C2 $\alpha^{D1268A/WT}$  mice.

Data represent mean  $\pm$  SEM.

(a-b) Glycaemia under fasted (a) and fed (b) conditions of 32-week-old female mice. n=12-23 mice were used.

(c-d) Plasma insulin levels under fasted (c) and fed (d) conditions of 32-week-old female mice. n=4-10 mice were used.

(e) GTT in 32-week-old female mice. Results shown are pooled data from 3 independent experiments using mice from different litters. n=9-13 mice were used.

(f) ITT in 32-week-old female mice. Results shown are pooled data from 2 independent experiments using mice from different litters. n=8-11 mice were used.

(g) PTT in 32-week-old male mice. n=6-9 mice were used.

Solid line, WT; dashed line, C2 $\alpha^{D1268A/WT}$ .
